# Supplementary material for: Effects of basalt, concrete fines, and steel slag on maize growth and heavy metal accumulation in an enhanced weathering experiment
Source: Copernicus journal article supplement (doi:10.5194/egusphere-2024-3022), 2024-10-09
Supplement: Supplementary file 1 [file egusphere-2024-3022-supplement.pdf]

**Fig. S1** Particle size distribution for basalt, concrete fines and steel slags. P80= 80% of the particles having a diameter less than or equal to this size.

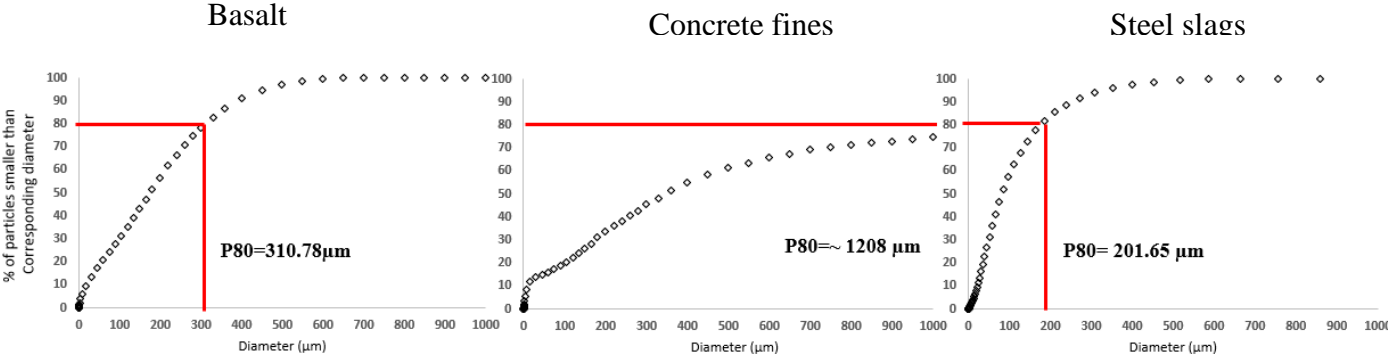

**Fig. S2** Soil water content during the experiment of the mesocosms for the different application rates of basalt, concrete fines and steel slags. Data retrieved from Cambell Scientific sensors (CS616).

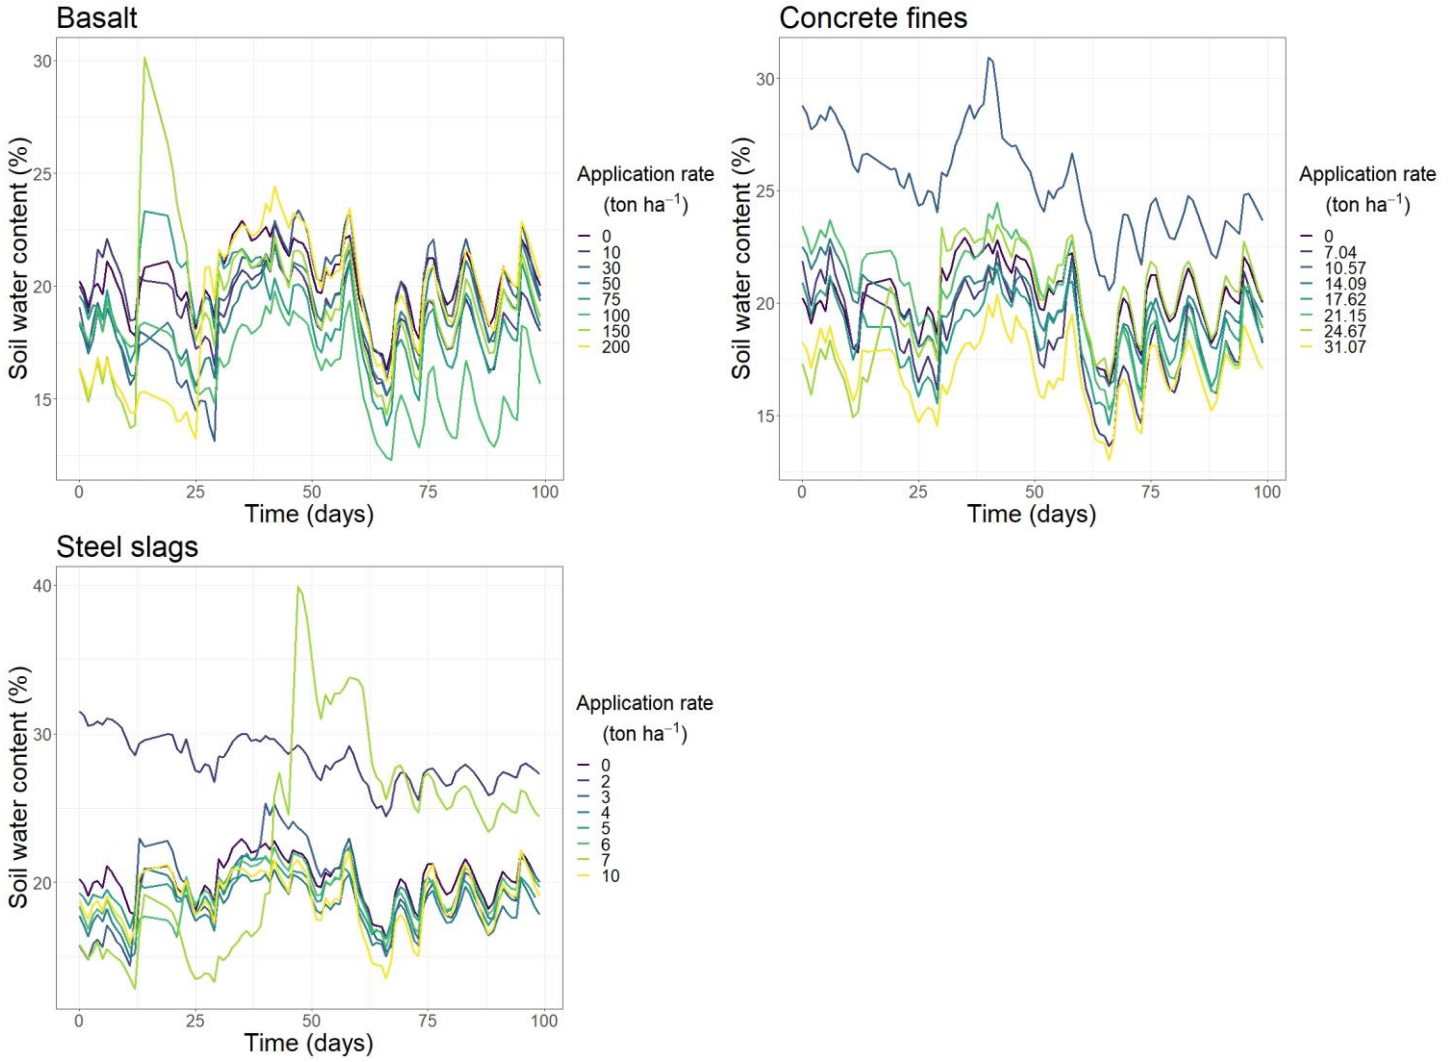

**Fig. S3** Daily precipitation and average air temperature during the experiment retrieved from visualcrossing (<https://www.visualcrossing.com/>). Average air temperature is shown within the range of minimum and maximum air temperature.

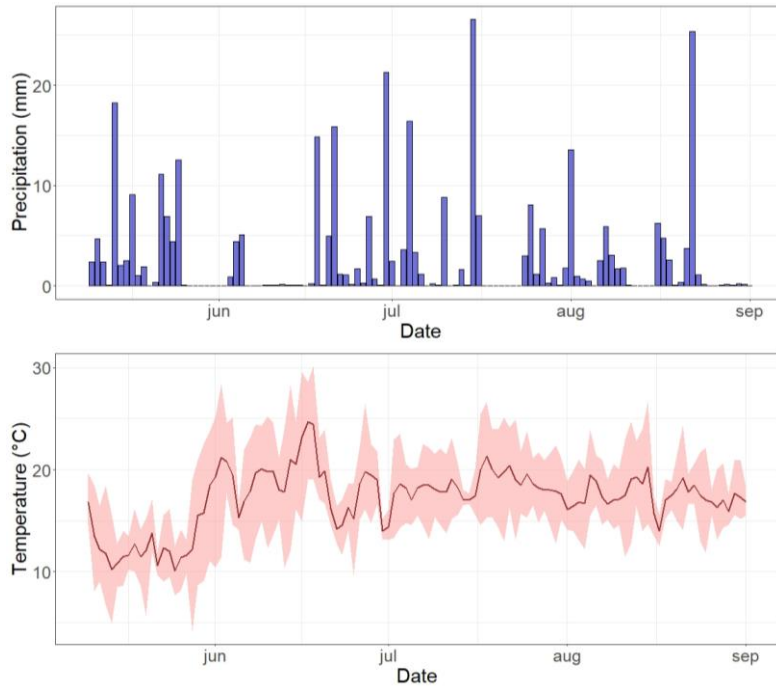

**Fig. S3** Plant nutrient availability retrieved from PRS probes on two occasions during the experiment for the application amount of the silicate (B = basalt, CF = concrete fines, S = steel slags). Data of 0 and 50 ton ha<sup>-1</sup> of basalt are average of five replicates with standard error. Note that in some cases, the error bars are smaller than the symbol. The other treatments have one measurement each. P- and F values are shown of a linear mixed model with nutrient availability from the PRS probes as response variable and application amount of the silicate material (=A), burial date (=D), and the interaction (A\*D) as covariable. Interactions are only shown when significant ( $p < 0.05$ ).

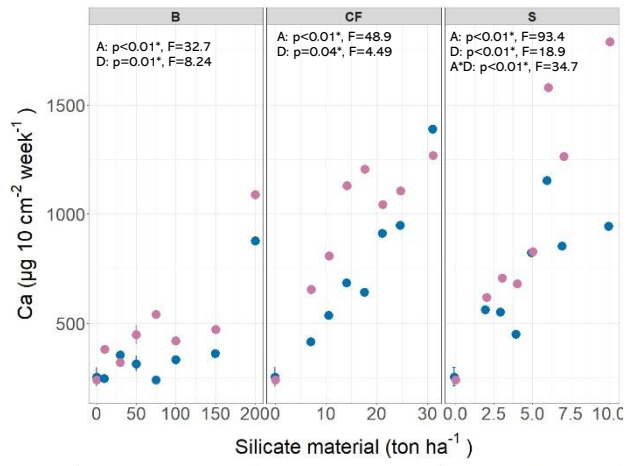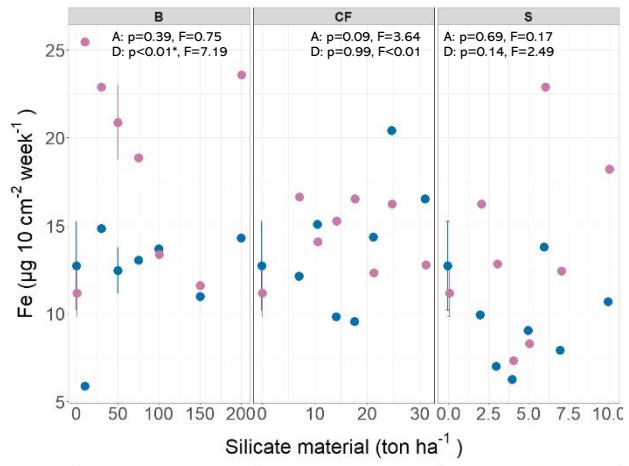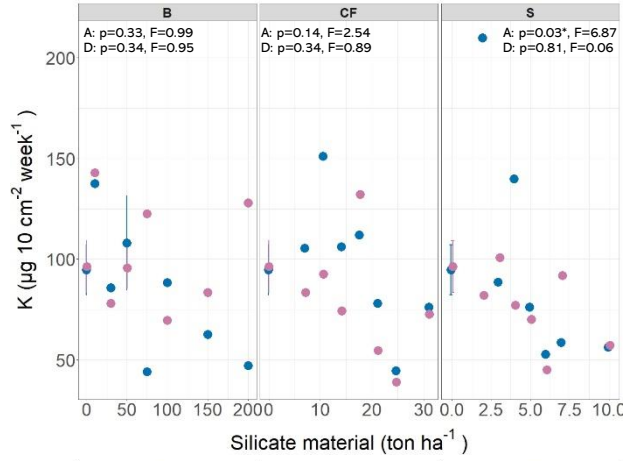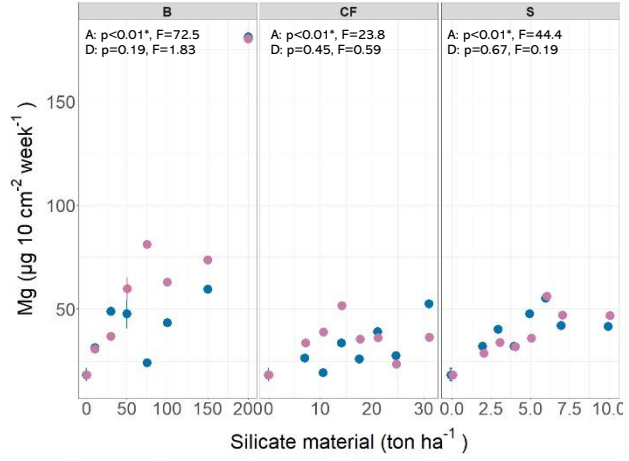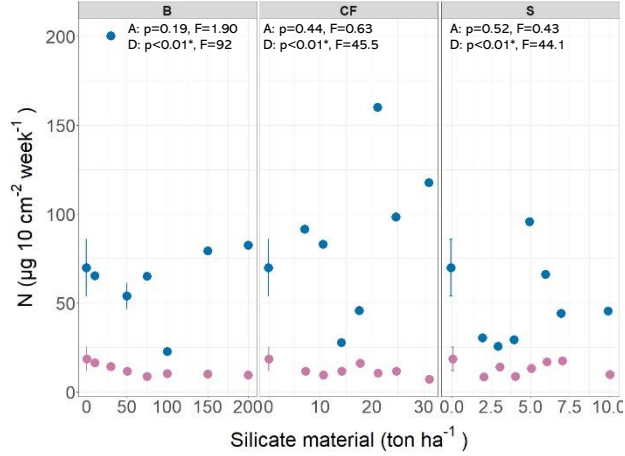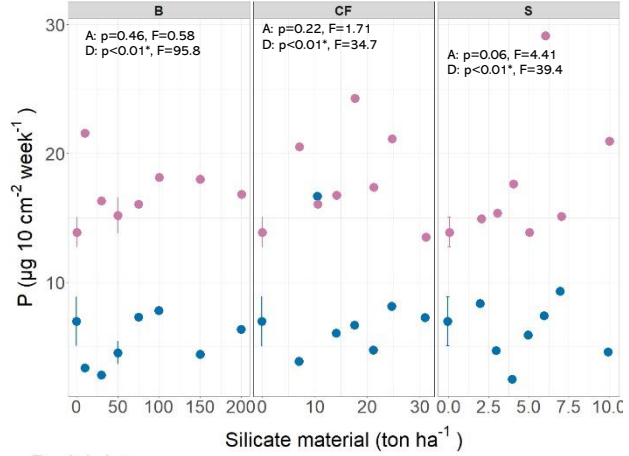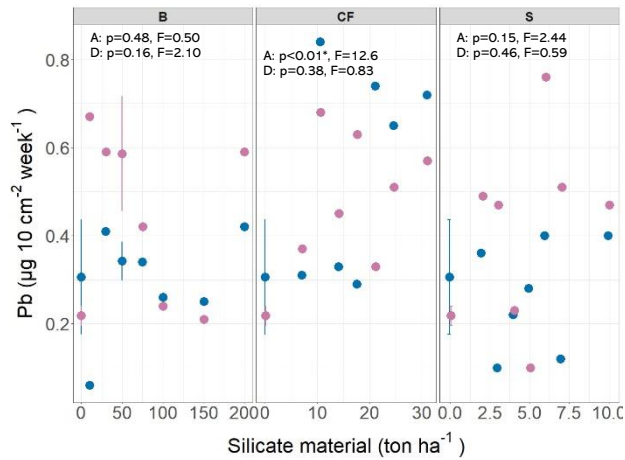

**Burial date**

- 2021-06-24
- 2021-08-02

**Fig. S4** C and N % in corn, tassel, stem and top leaf of the silicate treatments (basalt, concrete fines, steel slags). Data of 0 and 50 ton ha<sup>-1</sup> of basalt are average of five replicates with standard error. Note that in some cases, the error bars are smaller than the symbol. The other treatments have one measurement each. P and F-values are shown from a linear model with C and N % in the plant parts as response variable and application amount of the silicate material as covariable. Significant relationships are indicated with an asterisk (\*), with equation and regression line.

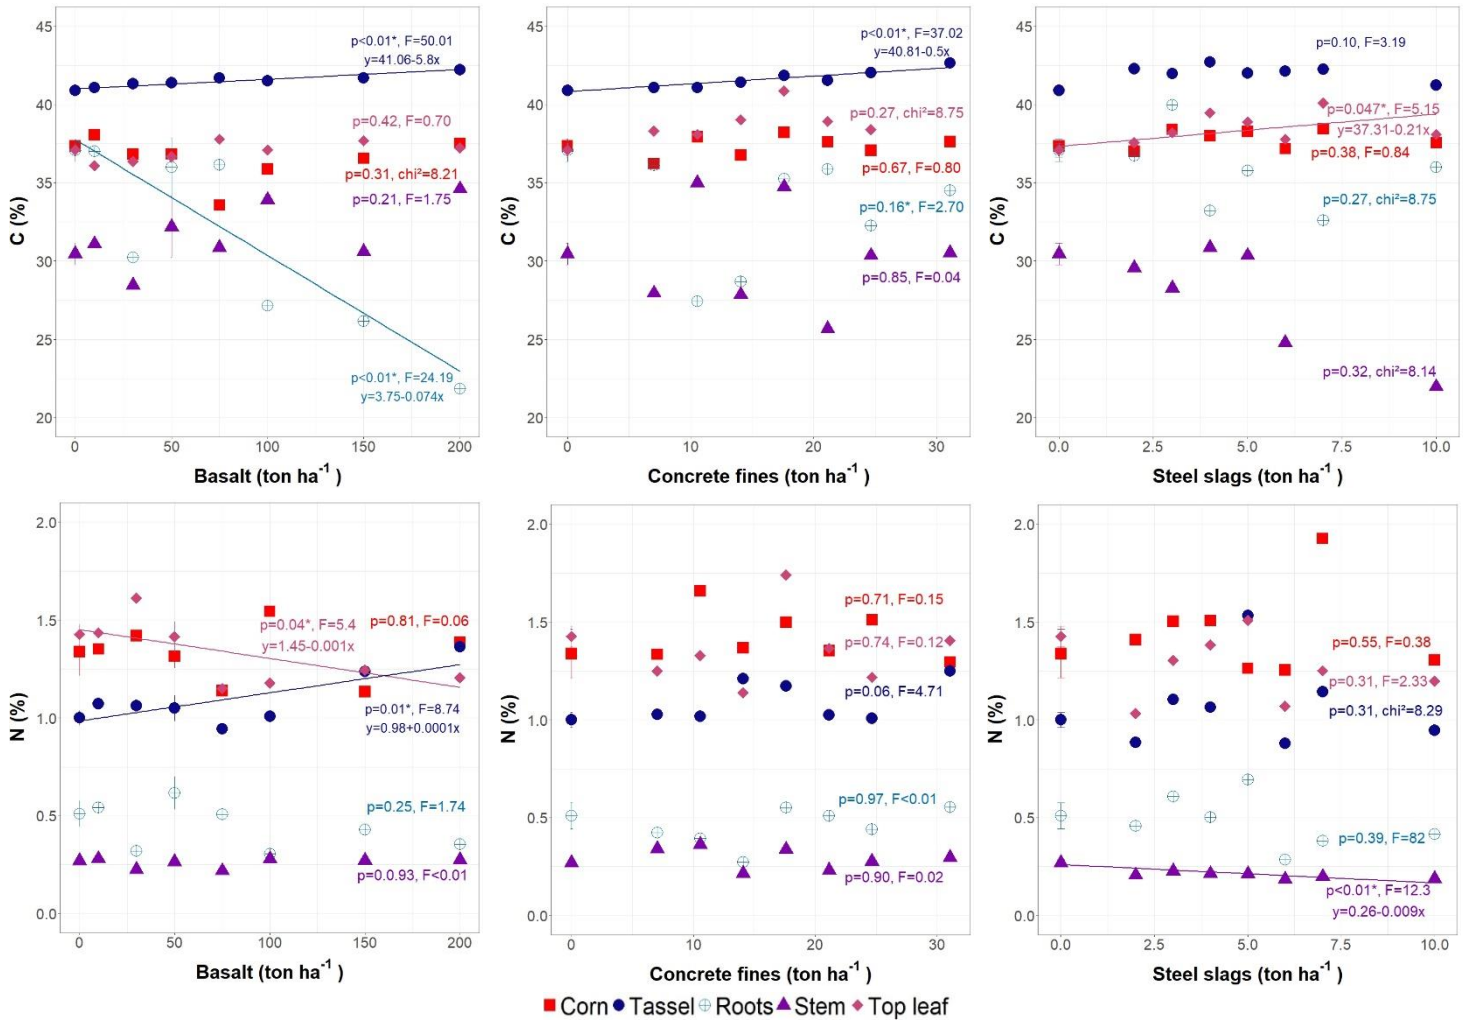

**Fig. S5** : C and N stocks in maize for the three silicate treatments (basalt, concrete fines, steel slags). Data for the control treatment (0 ton ha<sup>-1</sup>) and for 50 ton ha<sup>-1</sup> of basalt are average of five replicates with standard error. Note that in some cases, the error bars are smaller than the symbol. The other treatments each have one replicate. P and F-values are shown of the linear model with C or N stocks as response variable and relative addition (RA) as covariable. P- and F-values for the silicate treatments separately of a linear model with C or N stock as response variable and silicate concentration as covariable are shown as well. Significant relationships are indicated with an asterisk (\*), with equation and regression line.

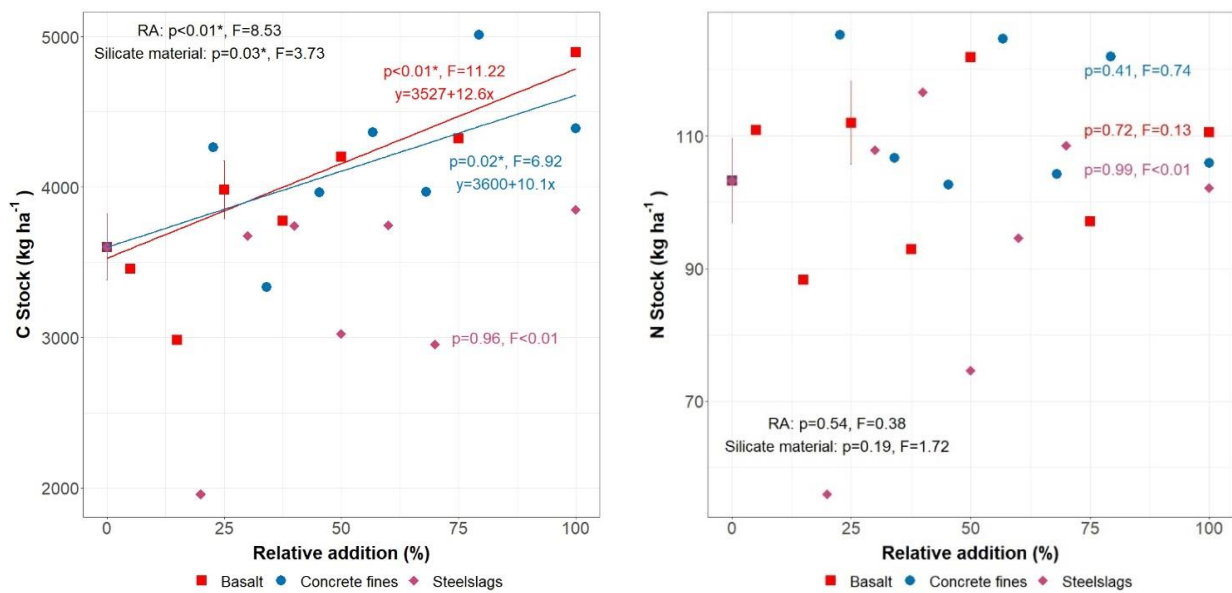

**Fig. S6** Ca:Mg ratio in the pore water during the experiment for the silicate treatments (basalt, concrete fines, steel slags). Data of 0 and 50 ton ha<sup>-1</sup> of basalt are average of five replicates with standard error. Note that in some cases, the error bars are smaller than the symbol. The other treatments have one measurement each. P and F-values are shown of a linear mixed model with Ca:Mg ratio as a response variable and silicate application amount, time and the interaction as covariables. Interactions were not significant ( $p > 0.05$ ) and are therefore not shown here.

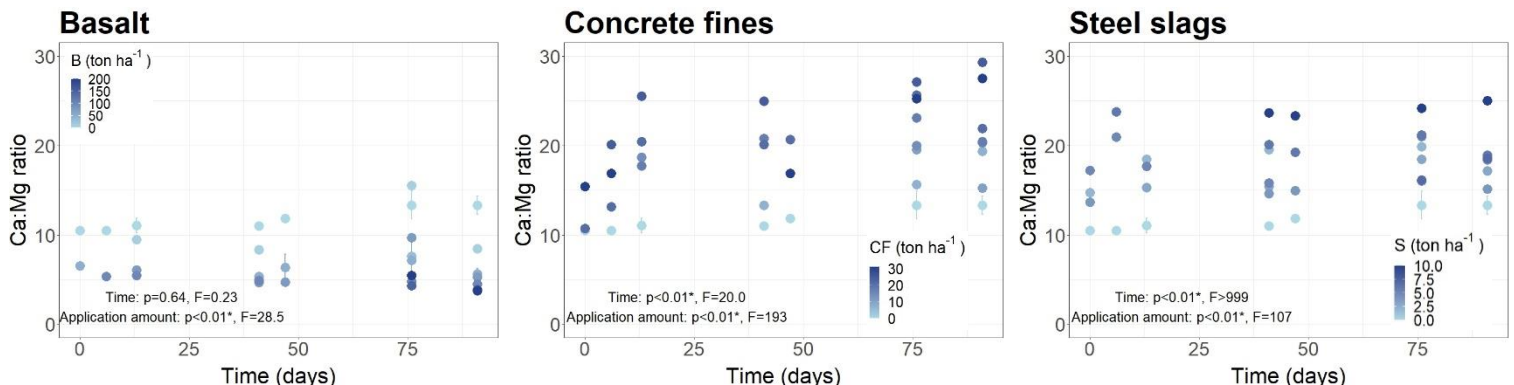

**Table S1** XRD of basalt, steel slags and concrete fines used in this study.

| Basalt          |        | Steel slags     |         | Concrete fines                                                                                |        |
|-----------------|--------|-----------------|---------|-----------------------------------------------------------------------------------------------|--------|
| Mineral phase   | Mass % | Mineral phase   | Mass %  | Mineral phase                                                                                 | Mass % |
| Clinopyroxene   | 21.22  | Srebrodolskite  | 8.36    | Quartz (SiO <sub>2</sub> )                                                                    | 73.42  |
| Enstatite       | 0.66   | Magnetite       | 1.81    | Calcite (CaCO <sub>3</sub> )                                                                  | 17.89  |
| Pigeonite       | 2.36   | beta-C2S        | 7.06    | Corundum (Al <sub>2</sub> O <sub>3</sub> )                                                    | 2.57   |
| Forsterite      | 14.45  | Bredigite       | 4.41    | Aluminium Iron Oxide<br>(Al <sub>2</sub> O <sub>3</sub> with 10% of the Al substituted by Fe) | 6.16   |
| Hedenbergite    | 6.98   | Wuestite        | 3.93    |                                                                                               |        |
| Ankerite        | 0.18   | Portlandite     | 2.38    |                                                                                               |        |
| Grossmanite     | 1.29   | Calcite         | 8.66    |                                                                                               |        |
| Albite          | 1.29   | Hematite        | 0.27    |                                                                                               |        |
| Labradorite     | 5.7    | Quartz          | 1.11    |                                                                                               |        |
| Analcime        | 0.93   | Periclase       | 1.92    |                                                                                               |        |
| Quartz          | 0.07   | Lime            | 0.00006 |                                                                                               |        |
| Magnetite       | 2.73   | Iron            | 0.62    |                                                                                               |        |
| Amorphous phase | 42.14  | Amorphous phase | 59.46   |                                                                                               |        |

**Table S2** The amount of water that was added manually during the experiment. For the control treatment and 50 ton ha<sup>-1</sup> of basalt, the experiment had 5 replicates. It is indicated how many of these replicates got the amount of water in the column 'Water added (L)'. From the 31 of May onwards, each mesocosm received the same amount of water.

| Date   | Water added (L) | treatments     | application rates (ton ha <sup>-1</sup> )      |
|--------|-----------------|----------------|------------------------------------------------|
| 17/May | 4               | Control        | 5x0                                            |
|        |                 | Basalt         | 10, 30, 4x50, 75, 100, 150, 200                |
|        |                 | Concrete fines | 7.04, 10.57, 14.09, 17.62, 21.15, 24.67, 31.07 |
|        |                 | Steel slags    | 2, 3, 4, 6, 7, 10                              |
| 5      |                 | Basalt         | 1x50                                           |
|        |                 | Steel slags    | 5                                              |
| 25/May | 4               | Control        | 3x0                                            |
|        |                 | Basalt         | 10, 3x50, 150, 200                             |
|        |                 | Concrete fines | 31.07                                          |

|        |     |                |                           |
|--------|-----|----------------|---------------------------|
|        |     | Steel slags    | 4, 7                      |
|        | 4.5 | Basalt         | 30                        |
|        |     | Concrete fines | 10.57, 14.09              |
|        |     | Steel slags    | 2, 10                     |
|        | 5   | Control        | 2x0                       |
|        |     | Basalt         | 1x50, 75, 100             |
|        |     | Concrete fines | 7.04, 17.62, 21.15, 24.67 |
|        |     | Steel slags    | 3, 6                      |
|        | 5.5 | Basalt         | 1x50                      |
|        | 6   | Steel slags    | 5                         |
| 31/May | 6.5 | All            | All                       |
| 7/Jun  | 1.5 | All            | All                       |
| 10/Jun | 2   | All            | All                       |
| 14/Jun | 2   | All            | All                       |
| 23/Jun | 1   | All            | All                       |
| 28/Jun | 1   | All            | All                       |
| 6/Jul  | 1   | All            | All                       |
| 13/Jul | 1   | All            | All                       |
| 22/Jul | 2   | All            | All                       |
| 26/Jul | 2   | All            | All                       |
| 2/Aug  | 2   | All            | All                       |
| 9/Aug  | 2   | All            | All                       |



**Table S3** The p and F-values from a linear mixed model with nutrient concentration in the pore water as response variable and concentration of the silicate material (basalt, concrete fines, steel slags), time (days after sowing) and the interaction as covariable (Fig 3). Ns=not significant, significant relationships are indicated with an asterisk (\*)

| <b>Ca</b>                    | <b>Basalt</b>  |                | <b>Concrete fines</b> |                | <b>Steel slags</b> |                |
|------------------------------|----------------|----------------|-----------------------|----------------|--------------------|----------------|
|                              | <b>p-value</b> | <b>F-value</b> | <b>p-value</b>        | <b>F-value</b> | <b>p-value</b>     | <b>F-value</b> |
| <i>Application rate</i>      | <0.01*         | 12.1           | <0.01*                | 974            | <0.01*             | 165.3          |
| <i>time</i>                  | <0.01*         | 9.27           | <0.01*                | 56.34          | <0.01*             | 28.74          |
| <i>application rate:time</i> | 0.04*          | 4.45           | ns                    | ns             | ns                 | ns             |
| <b>Mg</b>                    | <b>p-value</b> | <b>F-value</b> | <b>p-value</b>        | <b>F-value</b> | <b>p-value</b>     | <b>F-value</b> |
| <i>Application rate</i>      | <0.01*         | 8.22           | <0.01*                | 286.7          | <0.01*             | 65.3           |
| <i>time</i>                  | <0.01*         | 22.7           | <0.01*                | 133.07         | <0.01*             | 20.6           |
| <i>application rate:time</i> | <0.01*         | 3.16           | 0.04*                 | 4.62           | <0.01*             | 11.7           |
| <b>Si</b>                    | <b>p-value</b> | <b>F-value</b> | <b>p-value</b>        | <b>F-value</b> | <b>p-value</b>     | <b>F-value</b> |
| <i>Application rate</i>      | 0.09           | 3.06           | <0.01*                | 14.96          | <0.01*             | 10.22          |
| <i>time</i>                  | <0.01*         | 961.3          | <0.01*                | 106.1          | <0.01*             | 69.26          |
| <i>application rate:time</i> | <0.01*         | 15.34          | <0.01*                | 16.46          | 0.03*              | 5.45           |
| <b>Fe</b>                    | <b>p-value</b> | <b>F-value</b> | <b>p-value</b>        | <b>F-value</b> | <b>p-value</b>     | <b>F-value</b> |
| <i>Application rate</i>      | 0.76           | 0.1            | 0.03*                 | 6.46           | 0.87               | 0.03           |
| <i>time</i>                  | 0.2            | 1.3            | <0.01*                | 26.19          | <0.01*             | 10.14          |
| <i>application rate:time</i> | ns             | ns             | ns                    | ns             | ns                 | ns             |
| <b>K</b>                     | <b>p-value</b> | <b>F-value</b> | <b>p-value</b>        | <b>F-value</b> | <b>p-value</b>     | <b>F-value</b> |
| <i>Application rate</i>      | 0.57           | 0.34           | <0.01*                | 26.67          | 0.11               | 3.09           |
| <i>time</i>                  | 0.05           | 4.25           | 0.3                   | 1.13           | 0.57               | 0.33           |
| <i>application rate:time</i> | ns             | ns             | 0.2*                  | 5.86           | ns                 | ns             |

**Table S4** The p-and F-values of a linear mixed effect with dissolved inorganic carbon (DIC), pore water pH, soil pH and pore water nutrients or heavy metal concentration as response variable and silicate material, relative addition (RA) and the interaction as covariable. For DIC, pore water pH and soil pH, the interaction with time (day) is also incorporated in the model. RA is used to allow for comparison among the silicate types (Fig 2, 3, 4).

|                        | <b>DIC</b> |          | <b>pH</b> |          | <b>Soil pH</b> |          | <b>K</b>  |          |
|------------------------|------------|----------|-----------|----------|----------------|----------|-----------|----------|
|                        | <i>p</i>   | <i>F</i> | <i>p</i>  | <i>F</i> | <i>P</i>       | <i>F</i> | <i>p</i>  | <i>F</i> |
| <b>Silicate</b>        | <0.01*     | 8.02     | 0.06      | 2.84     | 0.01*          | 18.7     | 0.54      | 0.59     |
| <b>RA</b>              | <0.01*     | 169.3    | <0.01*    | 165      | <0.01*         | 77.4     | 0.12      | 2.59     |
| <b>RA *silicate</b>    | 0.01*      | 4.91     | 0.04*     | 3.79     | 0.04*          | 3.5      | ns        | ns       |
| <b>Silicate*day</b>    |            |          | ns        | ns       | 0.057          | 2.91     |           |          |
| <b>RA*silicate*day</b> |            |          | ns        | ns       | 0.01*          | 4.61     |           |          |
|                        | <b>Ca</b>  |          | <b>Fe</b> |          | <b>Mg</b>      |          | <b>Si</b> |          |
|                        | <i>p</i>   | <i>F</i> | <i>p</i>  | <i>F</i> | <i>p</i>       | <i>F</i> | <i>p</i>  | <i>F</i> |
| <b>Silicate</b>        | 0.01*      | 4.97     | 0.82      | 0.2      | 0.81           | 0.21     | 0.80      | 0.23     |
| <b>RA</b>              | <0.01*     | 13.30    | 0.02*     | 5.99     | 0.70           | 0.16     | 0.19      | 1.76     |
| <b>RA *silicate</b>    | <0.01*     | 7.82     | ns        | ns       | ns             | ns       | ns        | ns       |
|                        | <b>Cr</b>  |          | <b>Ni</b> |          | <b>Pb</b>      |          | <b>V</b>  |          |
|                        | <i>p</i>   | <i>F</i> | <i>p</i>  | <i>F</i> | <i>P</i>       | <i>F</i> | <i>p</i>  | <i>F</i> |
| <b>Silicate</b>        | 0.01*      | 4.88     | <0.01*    | 38.1     | <0.01*         | 8.44     | <0.01*    | 31.84    |
| <b>RA</b>              | 0.15       | 2.18     | 0.01*     | 7.09     | <0.01*         | 25.8     | <0.01*    | 58.13    |
| <b>RA *silicate</b>    | <0.01*     | 9.14     | <0.01*    | 12.2     | <0.01*         | 8.29     | <0.01*    | 23.86    |

**Table S5** The p-and F values from a linear mixed model with plant availability of Ca, Fe, K, Mg, total N, P and Pb retrieved from PRS probes as response variable and the relative addition (RA) of the different silicate materials (basalt, concrete fines and steel slags), burial date and the interaction between RA and silicate treatment as covariable. Significant relationships are indicated with an asterisk (\*)

| PRS probes         | <b>Ca</b> |       | <b>Fe</b> |      | <b>K</b> |      | <b>Mg</b> |       | <b>Total N</b> |       | <b>P</b> |      | <b>Pb</b> |      |
|--------------------|-----------|-------|-----------|------|----------|------|-----------|-------|----------------|-------|----------|------|-----------|------|
|                    | p-value   | F     | p-value   | F    | p-value  | F    | p-value   | F     | p-value        | F     | p-value  | F    | p-value   | F    |
| <b>RA</b>          | <0.01*    | 133.1 | 0.20      | 1.74 | 0.01*    | 7.36 | <0.01*    | 38.92 | 0.37           | 0.83  | 0.13     | 2.42 | 0.048*    | 4.3  |
| <b>Treatment</b>   | 0.01*     | 4.63  | 0.10      | 2.41 | 0.96     | 0.04 | <0.01*    | 6.42  | 0.59           | 0.54  | 0.47     | 0.78 | 0.46      | 0.8  |
| <b>Burial date</b> | <0.01*    | 15.46 | <0.01*    | 7.49 | 0.50     | 0.46 | 0.06      | 3.80  | <0.01*         | 204.4 | <0.01*   | 173  | 0.27      | 1.23 |
| <b>RA*T</b>        | <0.01*    | 6.64  | ns        | ns   | ns       | ns   | <0.01*    | 10.21 | ns             | ns    | ns       | ns   | ns        | ns   |

**Table S6** Table of Cd in pore water and Pb concentrations in plant stems that were above LOQ (for Cd = 0.0015 mg L<sup>-1</sup>, for Pb = 0.1 mg kg<sup>-1</sup>). For the other treatments, Cd and Pb concentrations were below LOQ.

| Treatment      | Application amount (ton ha <sup>-1</sup> ) | Cd        | Medium                              |
|----------------|--------------------------------------------|-----------|-------------------------------------|
| Control        | 0                                          | 0.00032   | Pore water<br>(mg L <sup>-1</sup> ) |
| Control        | 0                                          | 0.00023   |                                     |
| Basalt         | 30                                         | 0.00023   |                                     |
| Basalt         | 50                                         | 0.00022   |                                     |
| Basalt         | 150                                        | 0.00076   |                                     |
| Control        | 0                                          | 0.03      | Corn<br>(mg kg <sup>-1</sup> )      |
| Basalt         | 50                                         | 0.03      |                                     |
| Concrete fines | 21.14                                      | 0.03      |                                     |
|                |                                            | <b>Pb</b> |                                     |
| Basalt         | 10                                         | 0.21      | Stem<br>(mg kg <sup>-1</sup> )      |
| Basalt         | 30                                         | 0.20      |                                     |
| Basalt         | 50                                         | 0.22      |                                     |
| Steel slags    | 2                                          | 0.21      |                                     |

**Table S7** The P-and F-values obtained from a linear model with leaf area index (LAI) or aboveground:belowground ratio (A:B ratio) as response variable and silicate application amount as a covariable. LAI was measured on two occasions during the experiment.

| Day            | LAI day 43 |          | LAI day 70 |          | A:B ratio |          |
|----------------|------------|----------|------------|----------|-----------|----------|
|                | <i>p</i>   | <i>F</i> | <i>p</i>   | <i>F</i> | <i>P</i>  | <i>F</i> |
| Basalt         | 0.13       | 2.54     | 0.98       | 7*e-04   | 0.18      | 2.02     |
| Concrete fines | 0.35       | 0.98     | 0.16       | 2.36     | 0.28      | 1.34     |
| Steel slags    | 0.43       | 0.67     | 0.17       | 2.28     | 0.19      | 2.06     |

**Table S8** The P-and F-values of a linear model with total biomass, biomass of the different plant parts or aboveground:belowground ratio (A:B ratio) as response variable and type of silicate material (basalt, concrete fines or steel slags) and relative addition (RA) as covariables. Significant differences are indicated by an asterisk (\*). The interaction between silicate type and RA was also incorporated in the model, but were all not significant and are therefore not shown.

|               | Total biomass |          | Corn     |          | Stem     |          | Leaves   |          | Tassel   |          | Roots    |          | A:B ratio |          |
|---------------|---------------|----------|----------|----------|----------|----------|----------|----------|----------|----------|----------|----------|-----------|----------|
|               | <i>p</i>      | <i>F</i> | <i>p</i> | <i>F</i> | <i>p</i> | <i>F</i> | <i>p</i> | <i>F</i> | <i>p</i> | <i>F</i> | <i>p</i> | <i>F</i> | <i>p</i>  | <i>F</i> |
| Silicate type | 0.03*         | 3.92     | 0.09     | 2.56     | 0.21     | 1.62     | 0.17     | 1.86     | 0.49     | 0.73     | 0.95     | 0.05     | 0.81      | 0.22     |
| RA            | <0.01*        | 7.94     | 0.67     | 0.18     | <0.01*   | 7.78     | 0.07     | 3.46     | <0.01*   | 34.2     | <0.01*   | 12.67    | 0.01*     | 6.69     |

**Table S9** The p-and F values of a linear model with nutrient (Ca, Mg, Si, K, P) concentrations or the C:N ratio in the plant parts as response variable and relative addition (RA), type of silicate material (basalt, concrete fines, steel slags) and the interaction as covariables. Significant relationships are indicated with an asterisk (\*). Non-significant interactions are shown as ns and are removed from the model. For leaves and tassel, no significant interactions were found.

|               | Ca     |       | Mg     |      | Si     |      | K    |      | P     |      | Fe   |      | C:N ratio |      |      |
|---------------|--------|-------|--------|------|--------|------|------|------|-------|------|------|------|-----------|------|------|
|               | p      | F     | p      | F    | p      | F    | p    | F    | p     | F    | p    | F    | p         | F    |      |
| <b>Stem</b>   |        |       |        |      |        |      |      |      |       |      |      |      |           |      |      |
| Silicate      | <0.01* | 19.2  | <0.01* | 12.8 | 0.78   | 0.37 | 0.26 | 1.43 | 0.94  | 0.13 | 0.11 | 2.36 | 0.08      | 2.51 |      |
| RA            | 0.26   | 1.33  | 0.14   | 2.27 | 0.02   | 6.35 | 0.19 | 1.82 | 0.46  | 0.55 | 0.31 | 1.08 | 0.60      | 0.28 |      |
| <b>Corn</b>   |        |       |        |      |        |      |      |      |       |      |      |      |           |      |      |
| Silicate      | 0.83   | 0.30  | 0.60   | 0.64 | <0.01* | 15.9 | 0.13 | 2.08 | 0.59  | 0.34 | ns   | ns   | 0.48      | 0.84 |      |
| RA            | 0.32   | 1.04  | 0.14   | 2.36 | <0.01* | 79.0 | 0.46 | 0.56 | 0.51  | 0.29 |      |      | 0.67      | 0.13 |      |
| <b>Leaves</b> |        |       |        |      |        |      |      |      |       |      |      |      |           |      |      |
| Silicate      | 0.06   | 2.75  | <0.01* | 4.07 | <0.01* | 14.9 | 0.05 | 2.94 | 0.68  | 0.51 | 0.74 | 0.3  | 4.62      | 0.41 | 0.99 |
| RA            | 0.93   | <0.01 | <0.01* | 9.04 | <0.01* | 17.2 | 0.28 | 1.23 | 0.02* | 5.79 |      |      | <0.01*    | 10.2 |      |
| <b>Tassel</b> |        |       |        |      |        |      |      |      |       |      |      |      |           |      |      |
| Silicate      | 0.32   | 1.22  | 0.48   | 0.90 | 0.08   | 2.50 | 0.69 | 0.49 | 0.73  | 0.44 | 0.88 | 0.13 | 6.16      | 0.82 | 0.31 |
| RA            | 0.04*  | 4.89  | <0.01* | 26.5 | 0.04*  | 4.63 | 0.71 | 0.14 | 0.03* | 5.55 |      |      | 0.13      | 2.43 |      |
| <b>Roots</b>  |        |       |        |      |        |      |      |      |       |      |      |      |           |      |      |
| Silicate      | 0.03*  | 3.52  | <0.01* | 6.94 | 0.14   | 2.09 | 0.92 | 0.16 | 0.28  | 1.36 | 0.35 | 1.09 | 0.74      | 0.42 |      |
| RC            | <0.01* | 13.2  | 0.12   | 2.66 | 0.34   | 0.97 | 0.67 | 0.19 | 0.26  | 1.35 | 0.16 | 2.1  | 0.60      | 0.28 |      |
| Silicate*RA   | ns     | ns    | <0.01* | 7.87 | ns     | ns   | ns   | ns   | ns    | ns   |      |      | ns        | Ns   |      |

**Table S10** The p-and F values of a linear model with heavy metal (Cd, Cr, Fe, Ni, Pb, V) concentrations in the plant parts as response variable and relative addition (RA), type of silicate material (basalt, concrete fines, steel slags) and the interaction as covariables. Significant relationships are indicated with an asterisk (\*). Non-significant interactions are shown as ns and are removed from the model. For corn, leaves and tassel, no significant interactions were found.

|               | Cd     |      | Cr     |       | Ni     |       | Pb   |      | V      |      |
|---------------|--------|------|--------|-------|--------|-------|------|------|--------|------|
|               | p      | F    | p      | F     | p      | F     | p    | F    | p      | F    |
| <b>Stem</b>   |        |      |        |       |        |       |      |      |        |      |
| Silicate      | 0.01*  | 5.27 | 0.29   | 1.27  | 0.49   | 0.73  | <LOQ | <LOQ | 0.64   | 0.45 |
| RA            | <0.01* | 8.53 | 0.14   | 2.26  | 0.02*  | 6.22  | <LOQ | <LOQ | 0.49   | 0.49 |
| Silicate* RC  | 0.04*  | 3.54 | ns     | ns    | ns     | ns    | <LOQ | <LOQ | ns     | ns   |
| <b>Corn</b>   |        |      |        |       |        |       |      |      |        |      |
| Silicate      | <LOQ   | <LOQ | 0.99   | 41.4  | 0.01   | 5.22  | <LOQ | <LOQ | 0.85   | 0.17 |
| RA            | <LOQ   | <LOQ | <0.01* | <0.01 | <0.01* | 17.12 | <LOQ | <LOQ | 0.06   | 3.82 |
| <b>Leaves</b> |        |      |        |       |        |       |      |      |        |      |
| Silicate      | 0.97   | 0.03 | 0.78   | 0.25  | 0.61   | 0.26  | 0.5  | 0.7  | 0.9    | 0.11 |
| RA            | <0.01* | 7.47 | 0.85   | 0.04  | 0.61   | 0.5   | 0.23 | 1.47 | <0.01* | 9.45 |
| <b>Tassel</b> |        |      |        |       |        |       |      |      |        |      |
| Silicate      | 0.7    | 0.37 | 0.13   | 2.14  | 0.16   | 1.95  | 0.44 | 0.84 | 0.64   | 0.89 |
| RA            | <0.01* | 27.2 | 0.11   | 2.68  | 0.47   | 0.54  | 0.19 | 1.77 | 0.56   | 16.6 |

**Methods S1** Statistical analysis to investigate differences in influence among the three types of silicate materials on soil and plant variables.

Due to the differences in application amounts of the three silicate materials, direct comparison among the types of silicate material was not possible. Nonetheless, in an attempt to standardize across silicate materials, the application amounts were expressed as a percentage of the highest added amount, hereafter referred to as relative additions. A two-way ANOVA was employed to analyse the influence of silicate material type, relative addition, and their interaction on plant biomass, plant nutrient and metal concentrations, metal concentrations of the soil pore water, and CEC of the soil. The ‘area under curve’ method was utilized to assess the overall effect of silicate material type, relative addition, and their interaction on soil pH and soil pore water pH, DIC, and nutrient concentrations in the soil pore water over the growing season.
